# Supplementary material for: Comparison of outcomes of laparoscopic sacrocolpopexy with concomitant supracervical hysterectomy or uterine preservation
Source: PubMed Central journal article supplement (PMC10506926; doi:10.1007/s00192-023-05534-0), 2023-04-13
Supplement: 192_2023_5534_MOESM1_ESM.pdf [file 192_2023_5534_MOESM1_ESM.pdf]

Supplementary Table 1. Patients meeting the composite failure definition at 24 months and comparison of the differences in symptom scores at baseline and 24 months for LSC/SCH vs LSC/UP.

| Characteristic                | LSC/SCH (n = 52) vs. LSC/UP (n = 26) |          |     |          |          |
|-------------------------------|--------------------------------------|----------|-----|----------|----------|
|                               | (%)                                  | 95% CI   | (%) | 95% CI   | <i>P</i> |
| Composite failure*            | 9.8                                  | 4.2–22.0 | 3.8 | 0.6-24.3 | 0.95     |
| Anatomical failure (%)        | 3.9                                  | 1.0–14.8 | 0   | NA       | 0.72     |
| Reoperation                   | 2.0                                  | 0.3–13.1 | 0   | NA       | 0.29     |
| Anterior compartment prolapse | 2.0                                  | 0.3–13.1 | 0   | NA       | 0.33     |
| Apical compartment prolapse   | 2.0                                  | 0.3–13.1 | 0   | NA       | 0.48     |
| Posterior compartment         | 2.0                                  | 0.3–13.1 | 0   | NA       | 0.66     |

|            |     |          |     |      |      |
|------------|-----|----------|-----|------|------|
| prolapse   |     |          |     |      |      |
| Subjective | 2.1 | 0.3–14.2 | 4.2 | 0.6– | 0.26 |
| failure    |     |          |     | 26.1 |      |

---

\* Composite failure was defined as presence of at least one of the following: anatomical prolapse (leading edge of any compartment beyond the hymen), bulging reported when completing the PFDI-20, retreatment. PFDI-20 data of five patients were missing.

CI, confidence interval; CRADI, Colorectal-Anal Distress Inventory; LSC, laparoscopic sacrocolpopexy; MUS, mid-urethral sling; NA, not applicable; POPDI, Pelvic Organ Prolapse Distress Inventory-6; POP-Q, Pelvic Organ Prolapse Quantification; SCH, supracervical hysterectomy; UP, uterine preservatio

Supplementary Table 2. Factors associated with composite failure: Cox proportional hazards model of propensity score-matched patients who underwent LSC/SCH or LSC/UP.

| Characteristic                         | Univariate analysis |            |          | Multivariate analysis |               |          |
|----------------------------------------|---------------------|------------|----------|-----------------------|---------------|----------|
|                                        | HR                  | 95% CI     | <i>P</i> | HR                    | 95% CI        | <i>P</i> |
| Age                                    | 1.02                | 0.93–1.11  | 0.68     | 1.005                 | 0.89–<br>1.13 | 0.94     |
| Age: years ≥ 60                        | 0.53                | 0.068–4.08 | 0.54     |                       |               |          |
| BMI                                    | 1.11                | 0.97–1.26  | 0.13     | 1.23                  | 1.04–<br>1.45 | 0.01*    |
| BMI ≥ 25                               | 1.17                | 0.40–3.38  | 0.77     |                       |               |          |
| Ba (per centimeter)                    | 1.20                | 0.95–1.52  | 0.12     | 1.26                  | 0.92–<br>1.72 | 0.14     |
| Ba ≥ 2 cm                              | 2.13                | 0.57–8.00  | 0.26     |                       |               |          |
| LSC/UP, yes                            | 0.92                | 0.33–2.57  | 0.88     |                       |               |          |
| Preoperative POP-Q<br>stage IV         | 1.47                | 0.42–5.17  | 0.55     |                       |               |          |
| Parity, reference<br>number of 0 and 1 |                     |            |          |                       |               |          |

|                     |      |            |         |      |        |        |
|---------------------|------|------------|---------|------|--------|--------|
| Number of 2         | 1.58 | 0.20–12.46 | 0.66    |      |        |        |
| Number of 3 or more | 1.10 | 0.13–9.57  | 0.93    |      |        |        |
| Double mesh, yes    | 0.17 | 0.053–0.52 | 0.0021* | 0.18 | 0.033– | 0.049* |
|                     |      |            |         |      | 0.99   |        |
| Previous POP        | 4.12 | 0.90–19.0  | 0.069   | 0.80 | 0.16–  | 0.80   |
| surgery             |      |            |         |      | 10.57  |        |
| LOA, yes            | 1.27 | 0.27–5.98  | 0.76    |      |        |        |
| Constipation, yes   | 0.95 | 0.12–7.3   | 0.96    |      |        |        |

---

Ba, the most superior location of the front vaginal wall; BMI, body mass index;

CI, confidence interval; LOA, lysis of adhesions; LSC, laparoscopic

sacrocolpopexy; POP, pelvic organ prolapse; POP-Q, pelvic organ prolapse

quantification; SCH, supracervical hysterectomy; UP, uterine preservation.
